# Supplementary material
Source: HighWire-hosted journal article supplement (https://erj.ersjournals.com/content/55/6/2000024)
Supplement: inline-supplementary-material-2 [file inline-supplementary-material-2.pdf]

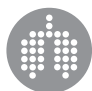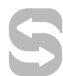

SHAREABLE PDF

# Population-based case-finding to identify subjects with undiagnosed asthma or COPD

Matthew Preteroti<sup>1</sup>, G. Alex Whitmore<sup>2</sup>, Katherine L. Vandemheen<sup>1</sup>, J. Mark FitzGerald<sup>3</sup>, Catherine Lemièrre<sup>4</sup>, Louis-Philippe Boulet<sup>5</sup>, Erika Penz<sup>6</sup>, Stephen K. Field<sup>7</sup>, Samir Gupta<sup>8</sup>, R. Andrew McIvor<sup>9</sup>, Irvin Mayers<sup>10</sup>, Paul Hernandez<sup>11</sup>, Diane Loughheed<sup>12</sup>, Martha Ainslie<sup>13</sup>, Christopher Liciskai<sup>14</sup>, Tanweer Azher<sup>15</sup>, Ian Fraser<sup>16</sup>, Masoud Mahdavian<sup>17</sup> and Shawn D. Aaron<sup>1</sup>

**Affiliations:** <sup>1</sup>The Ottawa Hospital Research Institute, University of Ottawa, Ottawa, ON, Canada. <sup>2</sup>Desautels Faculty of Management, McGill University, Montreal, QC, Canada. <sup>3</sup>Dept of Medicine, The University of British Columbia, Vancouver, BC, Canada. <sup>4</sup>Dept of Medicine, Université de Montreal, Montreal, QC, Canada. <sup>5</sup>Centre de recherche, Hôpital Laval, Université Laval, Quebec, QC, Canada. <sup>6</sup>Dept of Medicine, University of Saskatchewan, Saskatoon, SK, Canada. <sup>7</sup>Cumming School of Medicine, University of Calgary, Calgary, AB, Canada. <sup>8</sup>Dept of Medicine and the Li Ka Shing Knowledge Institute of St. Michael's Hospital University of Toronto, Toronto, ON, Canada. <sup>9</sup>Firestone Institute for Respiratory Health, McMaster University, Hamilton, ON, Canada. <sup>10</sup>Dept of Medicine, University of Alberta, Edmonton, AB, Canada. <sup>11</sup>Dept of Medicine, Dalhousie University, Halifax, NS, Canada. <sup>12</sup>Dept of Medicine, Queen's University, Kingston, ON, Canada. <sup>13</sup>Dept of Medicine, University of Manitoba, Winnipeg, MB, Canada. <sup>14</sup>Dept of Medicine, University of Western Ontario, London, ON, Canada. <sup>15</sup>Dept of Medicine, Memorial University, St John's, NL, Canada. <sup>16</sup>Michael Garron Hospital, Dept of Medicine, University of Toronto, Toronto, ON, Canada. <sup>17</sup>Royal Victoria Regional Health Centre, Barrie, ON, Canada.

**Correspondence:** Shawn D. Aaron, The Ottawa Hospital, General Campus, 501 Smyth Road, Ottawa, ON K1H 8L6, Canada. E-mail: [saaron@ohri.ca](mailto:saaron@ohri.ca)

 @ERSpublications

**20% of randomly selected individuals who report respiratory symptoms in Canada have undiagnosed airflow obstruction due to asthma or COPD** <http://bit.ly/2WdXlaH>

**Cite this article as:** Preteroti M, Whitmore GA, Vandemheen KL, *et al.* Population-based case-finding to identify subjects with undiagnosed asthma or COPD. *Eur Respir J* 2020; 55: 2000024 [https://doi.org/10.1183/13993003.00024-2020].

This single-page version can be shared freely online.

## ABSTRACT

**Background:** ~5–10% of adults may have undiagnosed airflow obstruction. The objective of this study was to develop a population-based case-finding strategy to assess the prevalence of undiagnosed airflow obstruction (asthma or COPD) amongst adults with respiratory symptoms in Canada.

**Methods:** Adults without a previous history of asthma, COPD or lung disease were recruited using random digit-dialling and asked if they had symptoms of dyspnoea, cough, sputum or wheeze within the past 6 months. Those who answered affirmatively completed the Asthma Screening Questionnaire (ASQ), COPD-Diagnostic Questionnaire (COPD-DQ) and COPD Assessment Test (CAT). Those with an ASQ score of  $\geq 6$  or a COPD-DQ score of  $\geq 20$  underwent pre- and post-bronchodilator spirometry to diagnose asthma or COPD.

**Results:** 12117 individuals were contacted at home and assessed for study eligibility. Of the 1260 eligible individuals, 910 (72%) enrolled and underwent spirometry. Ultimately, 184 subjects (20% of those enrolled) had obstructive lung disease (73 asthma and 111 COPD). Individuals found to have undiagnosed asthma or COPD had more severe respiratory symptoms and impaired quality of life compared with those without airflow obstruction. The ASQ, COPD-DQ, and CAT had ROC areas for predicting undiagnosed asthma or COPD of 0.49, 0.64 and 0.56, respectively. Four descriptive variables (age, BMI, sex and pack-years smoked) produced better receiver operating characteristic (ROC) values than the questionnaires (ROC area=0.68).

**Conclusion:** 20% of randomly selected individuals who report respiratory symptoms in Canada have

undiagnosed airflow obstruction due to asthma or COPD. Questionnaires could exclude subjects at low risk but lack the ability to accurately find subjects with undiagnosed disease.
